Title : EFFECTS OF INDUCTION AGENTS AND NON VOLATILE ANESTHETICS ON CHEMOTAXIS OF POLY\_MORPHONUCLEAR LEUKOCYTES ( PMN )

Authors : A. Mathieu, M.D., D. Mathieu, Ph.D., N. Hyslop, M.D.

Affiliation: Anesthesia Laboratories and Infectious Disease Unit, Department of Medicine, Harvard Medical School and Massachusetts General Hospital, Boston, Mass 02114

**Introduction.** The effects of local anesthetics on the cytoskeletal control of cell mobility has been well established. Reports of a reversible inhibition of chemotactic locomotion of polymorphonuclear cells *in vivo* during and after general anesthesia, using a modified Boyden chamber technique, have appeared recently<sup>1</sup>. Thus, we have investigated whether the non volatile anesthetics, i.e. induction agents, and drug adjuncts, used during anesthesia, i.e. narcotics, have any effects on the *in vitro* migration (chemotaxis) of polymorphonuclear leukocytes.

**Methods.** PMN migration beneath agarose gels was used as an assay. Blood from normal adult volunteers was collected on the day of the experiment in heparinized vacutainer tubes. The cells ( PMN ) were separated from whole blood by Ficoll hypaque density gradient centrifugation, followed by dextran sedimentation of the PMN-rich cell pellets, using sterile technique. Trypan blue dye exclusion test for viability of the PMN was performed, and the final cell suspension usually contained 95% PMN and 5% mononuclear cells. Approximately  $1 \times 10^6$  cells were delivered into each well of a petri dish containing agarose gels. The plates were covered and incubated for 18 hours at 37°C in a chamber with 5% CO<sub>2</sub> and 95% humidified air. At the end of the incubation, the gels were removed. Migration patterns and boundaries were clear and could easily be read with the measuring magnifier. Net migration diameter was calculated by subtracting the standard well diameter which for all control values was greater than 7 mm. Three induction agents, i.e. diazepam, ketamine and sodium thiopental; and two narcotics, fentanyl, which is a short-acting drug and morphine, a long-lasting drug, were investigated at different concentrations. For 3 drugs, exposing the cells for periods of 1-2 to 3 hours and washing the cells subsequently to study the possible reversibility of the action was also done.

**Results.** As seen in Figure 1, all the induction agents investigated displayed dose-related and statistically significant ( $p < 0.05$ ) inhibition of PMN migration, but usually at doses higher than those encountered clinically. As for the narcotics ( Table 1 ), only morphine displayed a statistically significant inhibition of PMN chemotaxis. Fentanyl seems to produce, at the doses investigated, a slight but not statistically significant increase in PMN migration, which decreases as the concentration increases. Preliminary data indicate that washing the cells after exposure to the drugs reverses the inhibition of PMN migration.

**Discussion.** Chemotaxis, i.e. the migration of leukocytes toward the locus of inflammation and of infection plays an important role in host defense mechanism. Any inhibition of the migration of PMN cells during or after anesthesia, induced by the anesthetic drugs or their metabolites, may create an increased risk of infection. Our data so far have not supported the *in vivo* observations<sup>1</sup>, i.e. the inhibition of PMN migration at anesthetic concentrations

of these drugs, except for morphine, but only at higher doses, not found *in vivo*. Our preliminary data show that the effect is reversible. Migration inhibition of PMN chemotaxis at the concentrations studied may be related to the indirect effects of the drugs on microtubules. In the earlier study<sup>1</sup>, the effect of multiple drugs was investigated, which we have not yet explored.

This study was supported in part by an Ayerst grant.

#### Reference.

1. Stanley TH, Hill GE, Portas MR *et al.*: Neutrophil chemotaxis during and after general anesthesia and operation. *Anesth Analg Curr Res* 55: 668-672, 1976

Table: EFFECT OF NARCOTICS ON PMN MIGRATION

| Fentanyl | Concentration<br>ug/ml | Percent Migration |
|----------|------------------------|-------------------|
|          | 2.0                    | 118               |
|          | 5.0                    | 114               |
|          | 10.0                   | 87                |
|          | 12.5                   | 92                |
| Morphine | 100                    | 22                |
|          | 500                    | 0                 |
|          | 960                    | 0                 |

EFFECT OF INDUCTION AGENTS ON PMN MIGRATION

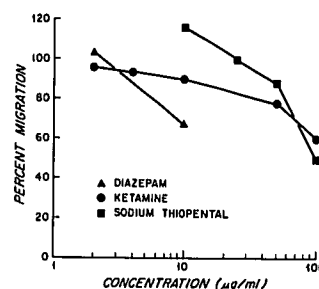

Source: https://asa2.silverchair.com/anesthesiology/article-pdf/51/3/S57/624661/0000542-197909001-00056.pdf
